# Supplementary material
Source: Royal Society of Chemistry journal article supplement (doi:10.1039/d6cc00307a)
Supplement: d6cc00307a1.pdf [file d6cc00307a1.pdf]

## Supporting Information

### Amino-Bridged Quantum Dots/Covalent Organic Frameworks S-Scheme

#### Heterojunction for Photocatalytic Overall Water Splitting

Weiqliang Guo<sup>a, b, e, ‡</sup>, Hongtao Li<sup>a, b, e, ‡</sup>, Yan-Xi Tan<sup>f</sup>, Lei Jiao<sup>b, c, \*</sup>, Zhendong Wang<sup>b, e</sup>, Qian Feng

<sup>a, b, e</sup>, Xiang Zhang<sup>b, c, \*</sup>, and Yaobing Wang<sup>b, c, d, \*</sup>

<sup>a</sup>College of Chemistry, Institute of Molecular Engineering Plus, Fuzhou University, Fuzhou

350116, P. R. China

<sup>b</sup>CAS Key Laboratory of Design and Assembly of Functional Nanostructures, and Fujian

Provincial Key Laboratory of Nanomaterials, State Key Laboratory of Structural Chemistry,

Fujian Institute of Research on the Structure of Matter, Chinese Academy of Sciences, fuzhou

350002, fujian, P. R. China.

<sup>c</sup>Fujian Science and Technology Innovation Laboratory for Optoelectronic Information of China,

Fuzhou 350108, Fujian, P. R. China.

<sup>d</sup>University of Chinese Academy of Sciences, Beijing 100049, P. R. China.

<sup>e</sup>Fujian College, University of Chinese Academy of Sciences, Fuzhou 350002, P. R. China

<sup>f</sup>Guangxi Key Laboratory of Chemistry and Engineering of Forest Products Guangxi Minzu

University, Nanning, Guangxi 530006, P. R. China

\*Corresponding authors.

‡ These authors contributed equally to this work.

## Experimental details

### Materials and Chemicals

The chemicals 1,3,5-triformylphloroglucinol (TPG), 3,3'-dinitrobenzidine (DNB), and tin(II) chloride dihydrate ( $\text{SnCl}_2 \cdot 2\text{H}_2\text{O}$ ) were purchased from Admas, while cadmium chloride ( $\text{CdCl}_2$ ), 3-mercaptopropionic acid (3-MPA), and sodium sulfide nonahydrate ( $\text{Na}_2\text{S} \cdot 9\text{H}_2\text{O}$ ) were supplied by Sinopharm Chemical Reagent Co., Ltd. (Shanghai, China). All reagents were used as received without further purification.

### Synthesis of $\text{NO}_2$ -COF and $\text{NH}_2$ -COF.

$\text{NO}_2$ -COF was synthesized via a modified solvothermal method<sup>1</sup>. Briefly, TPG (0.25 mmol) and DNB (0.38 mmol) were combined in a mixed solvent of n-butanol and 1,2-dichlorobenzene (10 mL, 1:1 by volume). To this mixture, 1 mL of 6 M acetic acid was introduced as a catalyst. After transferring the solution to a Schlenk tube and sonicating for 10-15 min to ensure homogeneity, the tube was flash-frozen in a liquid nitrogen bath (77 K) and subjected to three freeze-pump-thaw cycles for degassing. The sealed tube was then heated at 120 °C for 72 hours. The resulting precipitate was isolated by suction filtration, thoroughly washed with ethanol, anhydrous DMF, and acetone, and finally dried under vacuum at 60 °C for 12 h, ultimately yielding  $\text{NO}_2$ -COF with an isolated yield of 82%.  $\text{NH}_2$ -COF was reduced by  $\text{SnCl}_2 \cdot 2\text{H}_2\text{O}$  using Lohse's method<sup>2</sup>, with a yield of 88%.

### Synthesis of CdS QDs.

CdS QDs were synthesized according to a standard method<sup>3</sup>. Typically, an aqueous solution (20 mL) containing  $\text{CdCl}_2$  (1 mmol) and 3-MPA (1.7 mmol) was prepared, and its pH was adjusted to 10 using a 2.0 M NaOH solution. The resulting mixture was transferred to a 50 mL three-necked

flask, which was purged with Ar to remove air. After stirring at room temperature for 30 minutes, 1 mL of Na<sub>2</sub>S solution (containing 1 mmol of Na<sub>2</sub>S) was rapidly injected into the flask, and the reaction temperature was set to 100 °C. After 1 hour of reaction, the system was allowed to cool naturally to room temperature. Ethanol was added to the mixture, and the product was separated by centrifugation. It was then redispersed in an aqueous solution for subsequent use.

### **Synthesis of NH<sub>2</sub>-COF/CdS and NO<sub>2</sub>-COF/CdS.**

Firstly, 150 mg of NH<sub>2</sub>-COF was ball-milled at 600 revolutions per second for 3 hours, then dispersed in 10 mL of water. The dispersion was transferred to a 50 mL three-necked flask and stirred for 2 hours (serving as the pretreated NH<sub>2</sub>-COF). Separately, the cadmium precursor was prepared by dissolving CdCl<sub>2</sub> (0.5 mmol) and 3-MPA (0.85 mmol) in deionized water (10 mL), followed by pH adjustment to ~10 with 2.0 M NaOH. The above-prepared cadmium precursor solution was added to the three-necked flask containing the pretreated NH<sub>2</sub>-COF, and the combined mixture's pH was readjusted to 10. The mixture was bubbled with argon (Ar) to purge air; after 30 minutes, 1 mL of sodium sulfide (Na<sub>2</sub>S) solution (containing 0.5 mmol of Na<sub>2</sub>S) was rapidly injected into the flask. The temperature was swiftly elevated to 100 °C and held for 1 h. The final product was recovered by centrifugation, washed repeatedly with deionized water and ethanol, and vacuum-dried at 60 °C for 12 h. The resulting composite catalyst was designated as NH<sub>2</sub>-COF/CdS-1. By varying the dosage of the cadmium precursor solution (0.25, 1, and 2 mmol), materials with different CdS loadings were obtained, and the corresponding catalysts are designated as NH<sub>2</sub>-COF/CdS-0.25, NH<sub>2</sub>-COF/CdS-1, NH<sub>2</sub>-COF/CdS-2 and NO<sub>2</sub>-COF/CdS-0.5, respectively.

### **Characterization**

The PXRD pattern of the samples was recorded on an X-ray diffractometer with Cu-Kα

radiation (D8 Advance, Bruker Ltd., Germany). The distribution of co-catalysts was observed by transmission electron microscopy (TEM). Porosity was measured using the BET instrument (ASAP2460, Micromeritics). Fourier transform infrared spectroscopy (FTIR) spectra were recorded on a TENSOR 27 spectrometer (Bruker Ltd., Germany). UV-Vis-DRS spectroscopy was performed using a PerkinElmer Lambda 950. The X-ray photoelectron spectra (XPS) were examined with Thermo Kalpha. The photoluminescence spectra (PL) of the samples were recorded in SPEX Fluorolog-3 spectrofluorometer. Thermogravimetric analysis (TGA) was performed on a Netzsch STA 499C instrument under nitrogen atmosphere at a heating rate of  $10^{\circ}\text{C}\cdot\text{min}^{-1}$  to evaluate the thermal stability of the as-prepared samples. Atomic force microscopy (AFM) images were obtained using a Bruker Dimension ICON microscope to characterize the thickness and morphology of the nanosheets. Elemental analysis (C, H, N, S) was carried out on an Elementar Vario EL III elemental analyzer to determine the composition of the COF and its composites.

### **Photoelectrochemical measurements**

The Mott-Schottky plot (M-S), transient photocurrent spectra (I-T) and electrochemical impedance spectra (EIS) measurements were conducted on a CHI660E electrochemical workstation in a three-electrode cell system under ambient conditions under irradiation of a 300 W Xe lamp. The ITO coated photocatalyst as the working electrode, a Pt foil as the counter electrode, and an Ag/AgCl electrode as the reference electrode. The three electrodes were inserted in a beaker filled with 0.5 M  $\text{Na}_2\text{SO}_4$  electrolyte.

### **Computational details**

In the calculations, density functional theory (DFT) was performed with the Vienna Abinitio Simulation Package (VASP),<sup>4</sup> The projector augmented wave (PAW) methods were applied for the

interactions between valence electrons and atomic nucleus.<sup>5</sup> The electron exchange-correlation function used the Perdew-Burke-Ernzerhof (PBE) of the generalized gradient approximation (GGA). The energy cut-off of the wave function in the plane-wave basis was selected, The DFT-D2 method was used to describe the van der Waals interaction. Additionally, the K point sampling of Brillouin zone only used the gamma point of  $1 \times 1 \times 1$  Monkhorst-Pack scheme. The calculations were terminated until the maximum force upon each atom and energy were less than  $0.02 \text{ eV}/\text{\AA}$  and  $1.0 \times 10^{-5} \text{ eV}$ , Spin polarization was used throughout the calculation.

### **Evaluation of photocatalytic OWS reaction**

Photocatalytic reactions for overall water splitting were conducted in a Pyrex top-irradiation reaction vessel using a Perfect Light (Labsolar 6A) closed gas circulation system. In each reaction, 5mg of the photocatalyst was dispersed in 100 mL of deionized water. 5wt% Pt was photodeposited in-situ as the hydrogen evolution cocatalyst before the photocatalytic reaction. A 300 W xenon lamp equipped with an AM 1.5G filter served as the light source, with an irradiance intensity of  $100 \text{ mW cm}^{-2}$  (standard solar intensity) covering the wavelength range of 300-1100 nm. The reaction temperature was maintained at  $25^\circ\text{C}$  by a circulating cooling water system throughout the experiment. The products were analyzed by online 9790 gas chromatography (Agilent) with argon (AR) as the carrier gas. Following the photocatalytic experiment, the photocatalyst was washed with water and acetone, collected, and then dried under vacuum at  $60^\circ\text{C}$ . The photocatalytic OWS performance of  $\text{NH}_2\text{-COF/CdS}$  was studied.

## Supplementary figures and table

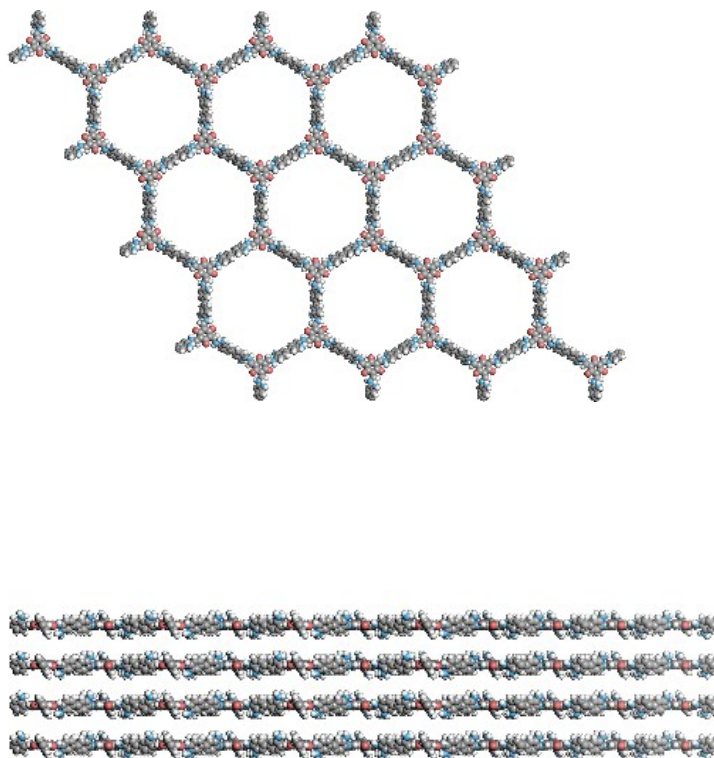

Figure S1 Chemical structure model diagram of  $\text{NH}_2\text{-COF}$ .

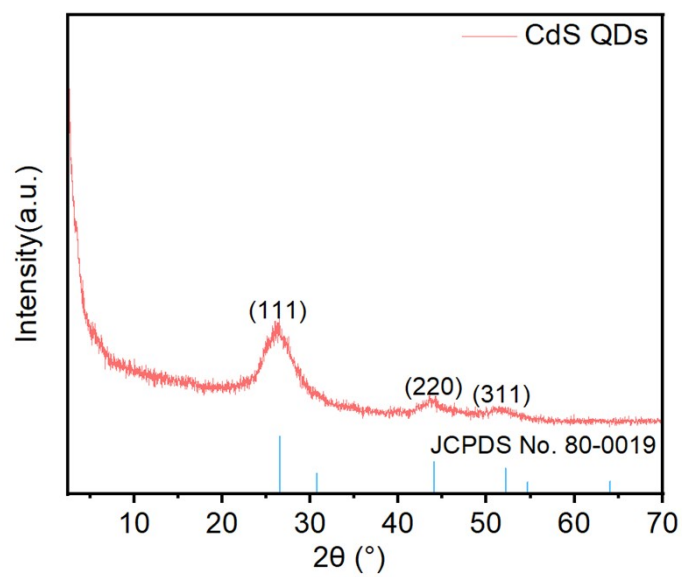

Figure S2. Experimental PXRD patterns of CdS QDs and standard card (No. 80-0019) of CdS.

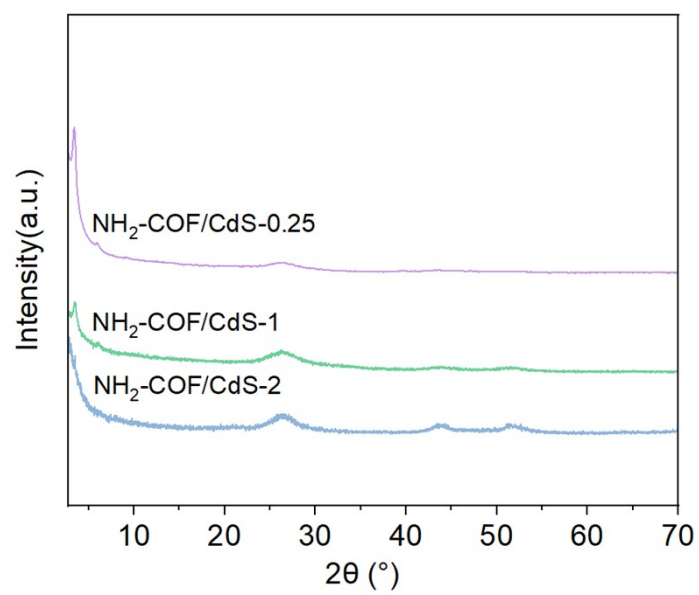

Figure S3. Experimental PXRD patterns of NH<sub>2</sub>-COF/CdS-x (x=0.25, 1, 2).

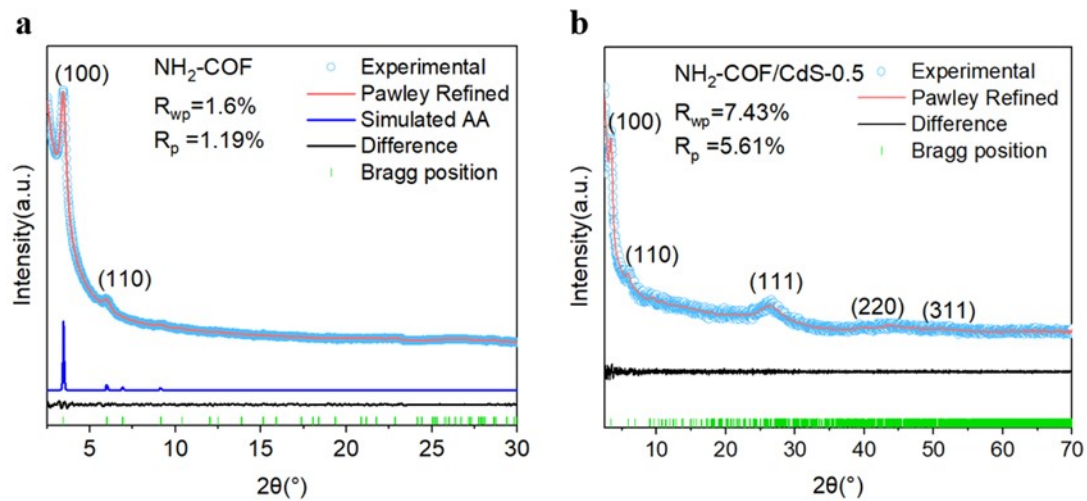

Figure S4. Pawley refinement data of (a)  $\text{NH}_2\text{-COF}$  and (b)  $\text{NH}_2\text{-COF/CdS-0.5}$ .

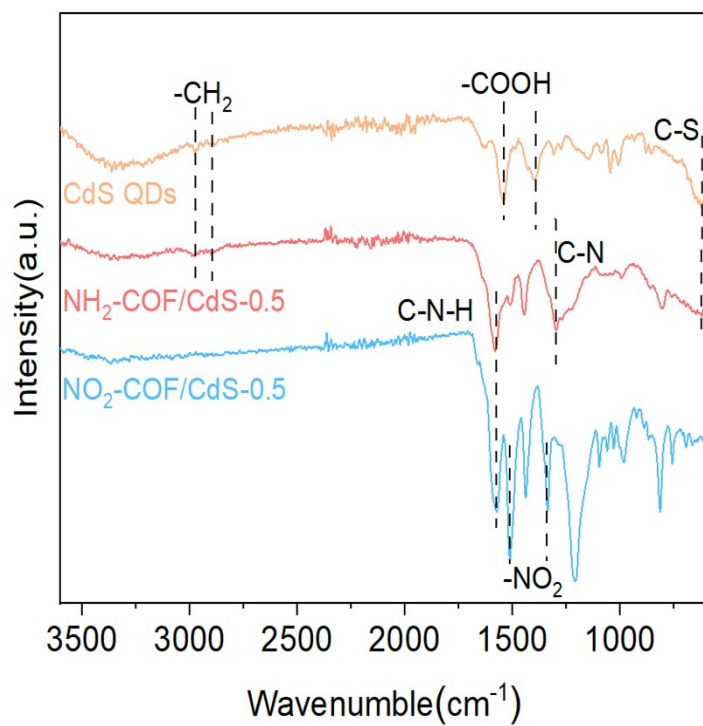

Figure S5. FTIR spectra of NO<sub>2</sub>-COF/CdS-0.5, NH<sub>2</sub>-COF/CdS-0.5 and CdS QDs.

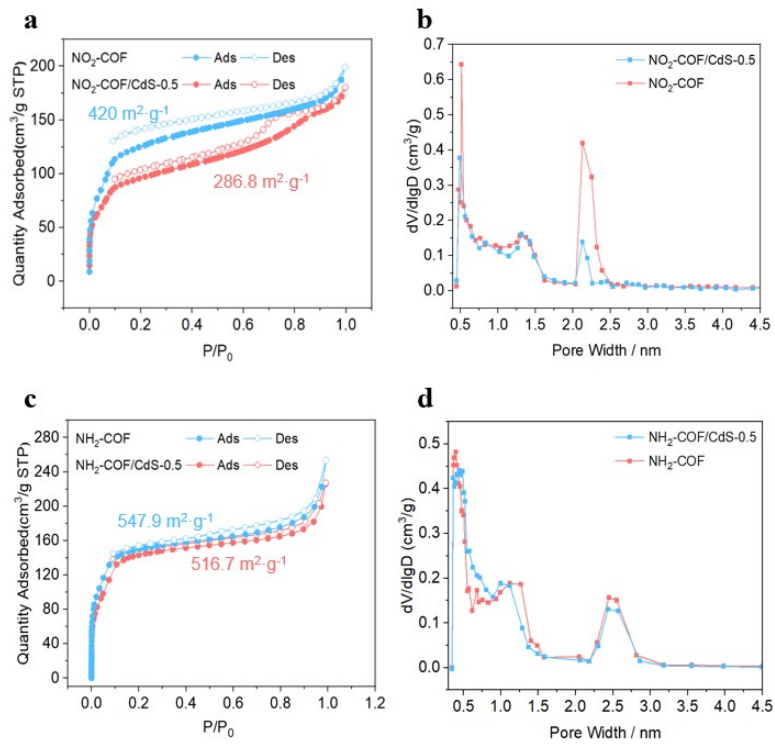

Figure S6.  $\text{N}_2$  adsorption-desorption measurements and Pore size distributions of  $\text{NO}_2\text{-COF}$ ,  $\text{NO}_2\text{-COF/CdS-0.5}$ ,  $\text{NH}_2\text{-COF}$ , and the  $\text{NH}_2\text{-COF/CdS-0.5}$ .

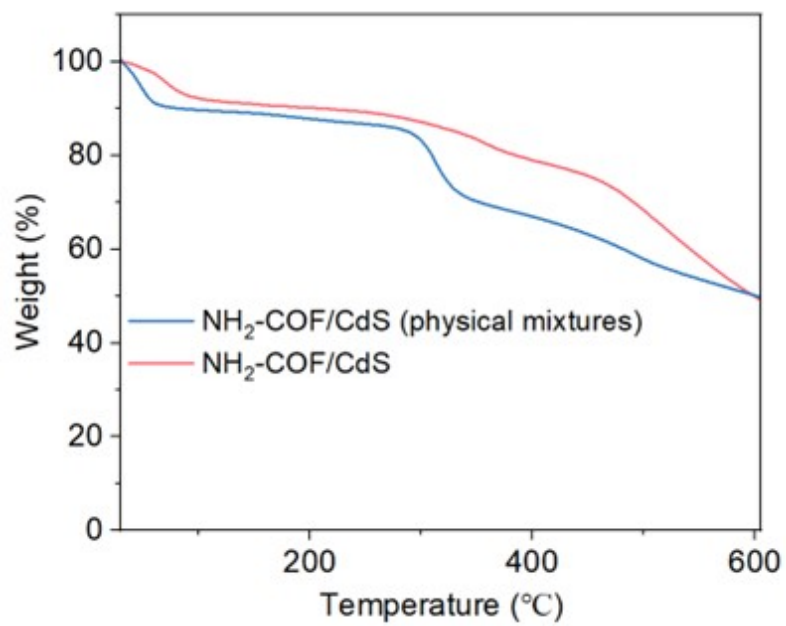

Figure S7. TGA spectra of physically mixed NH<sub>2</sub>-COF/CdS and NH<sub>2</sub>-COF/CdS composites.

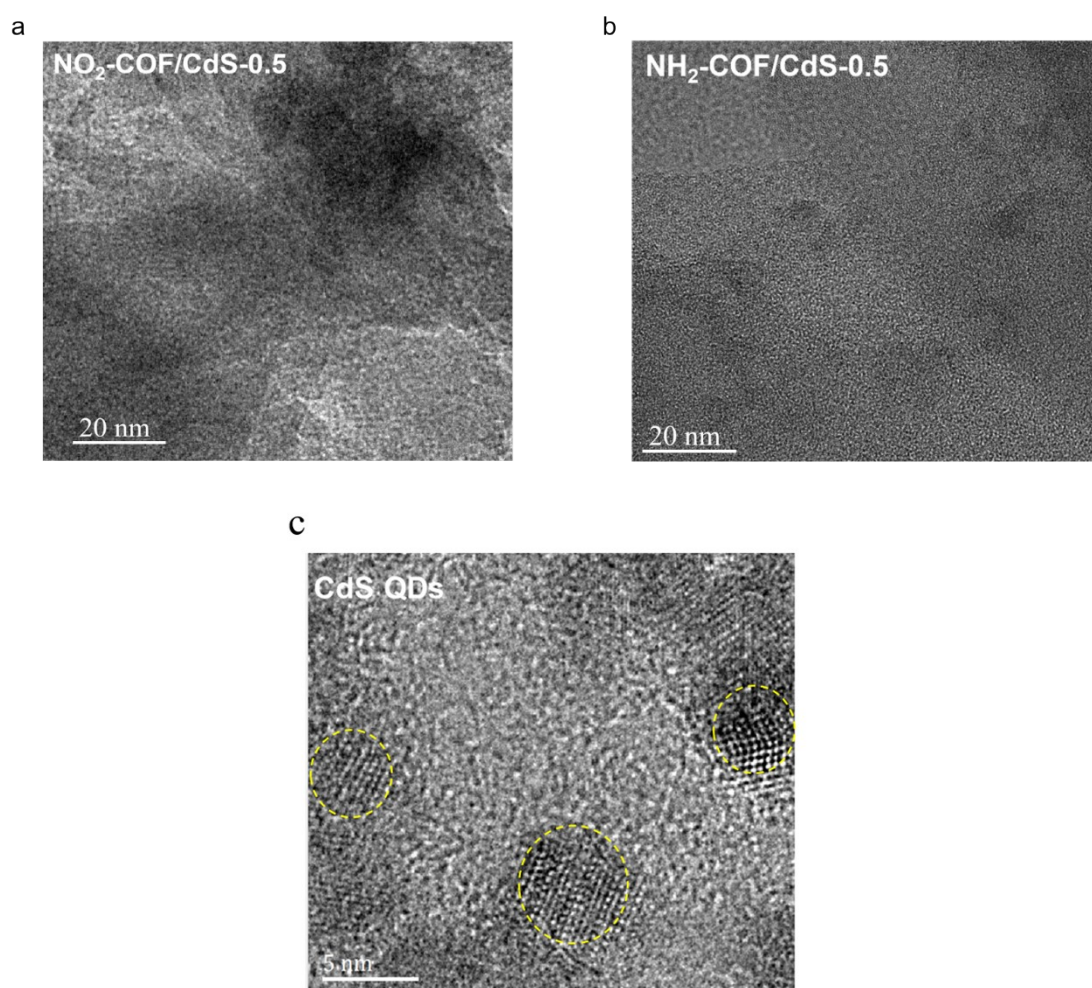

Figure S8. TEM of (a) NO<sub>2</sub>-COF/CdS-0.5, (b) NH<sub>2</sub>-COF/CdS-0.5 and (c) CdS QDs.

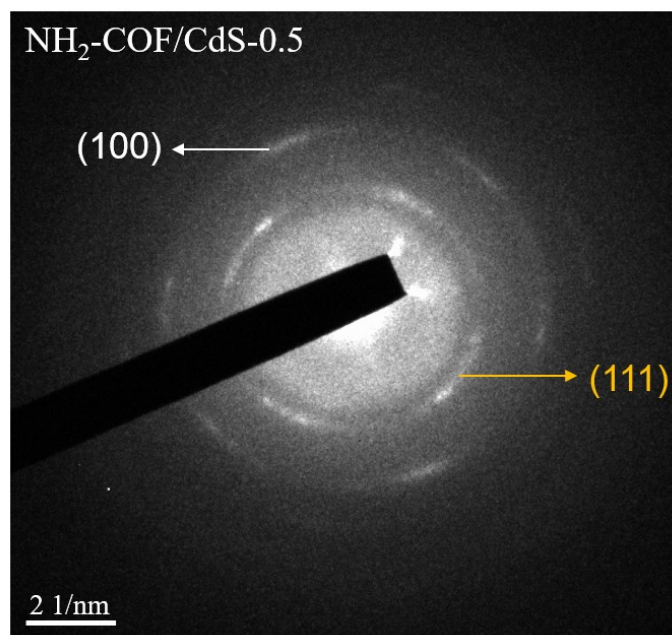

Figure S9. SAED pattern of  $\text{NH}_2\text{-COF/CdS-0.5}$ .

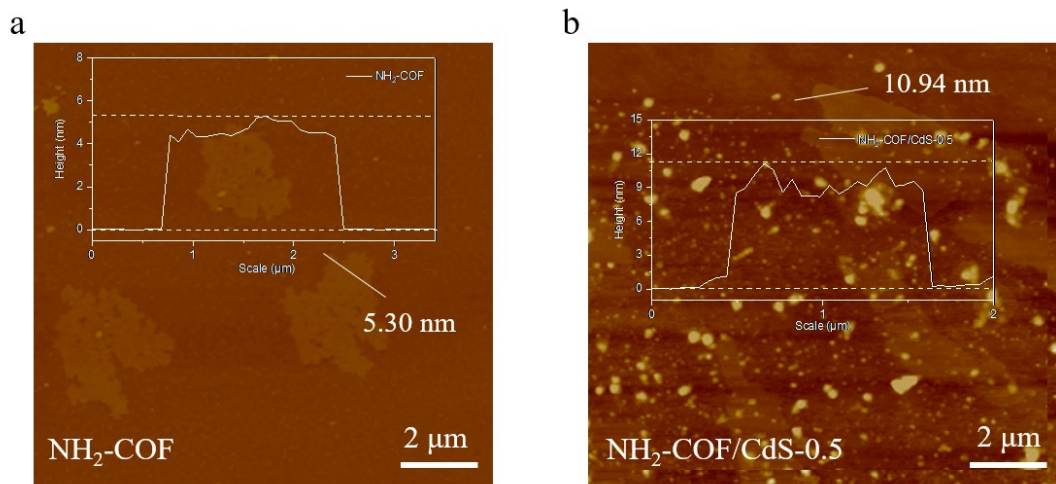

Figure S10. Atomic force microscopy (AFM) images and corresponding height profiles of (a)  $\text{NH}_2\text{-COF}$  and (b)  $\text{NH}_2\text{-COF/CdS-0.5}$  composite.

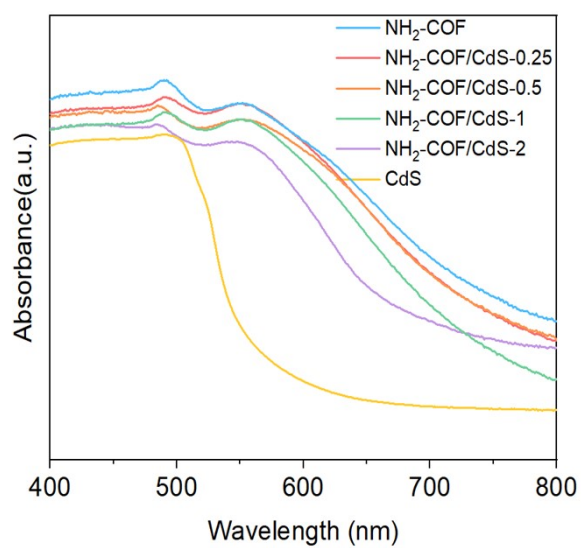

Figure S11. UV-vis DRS spectra of NH<sub>2</sub>-COF, CdS, and composite.

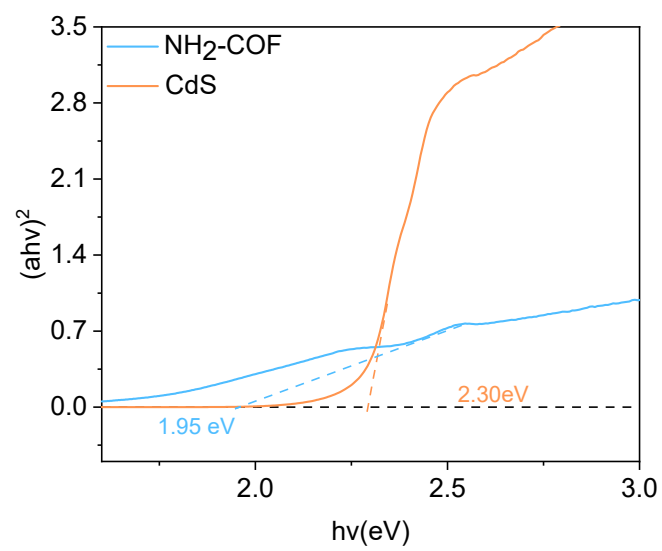

Figure S12. Tauc Plots of NH<sub>2</sub>-COF and CdS QDs.

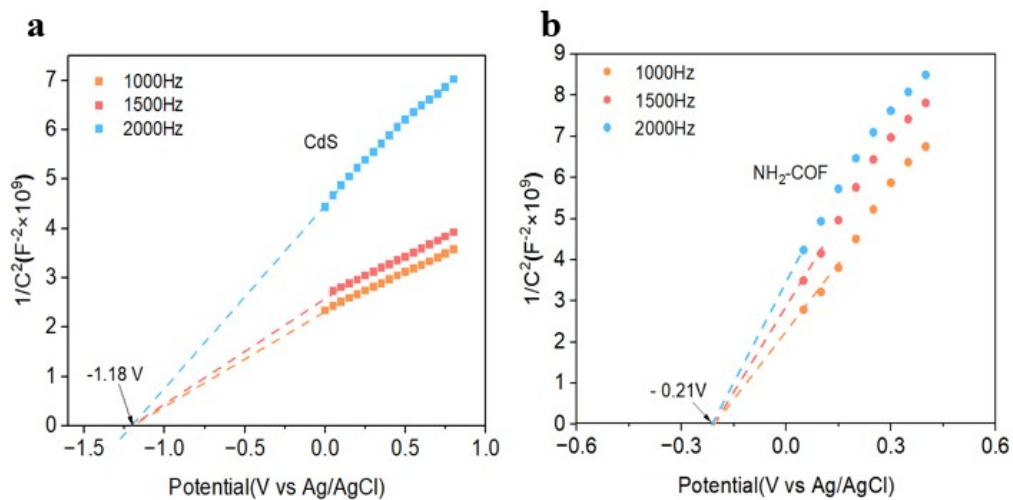

Figure S13. Mott-Schottky plots of CdS QDs (a) and NH<sub>2</sub>-COF (b). The flat band potentials were obtained from the Mott-Schottky plots. Both NH<sub>2</sub>-COF and CdS QDs exhibit n-type semiconductor characteristics, with flat band potentials of -0.21 V (vs Ag/AgCl) for NH<sub>2</sub>-COF and -1.18 V vs (Ag/AgCl) for CdS QDs. These values correspond to conduction band (CB) positions of -0.01 V and -0.98 V (vs. NHE, pH = 7). Subsequent calculation of the valence band (VB) positions, leveraging the optical band gaps, yielded values of +1.94 V for NH<sub>2</sub>-COF and +1.32 V for CdS.

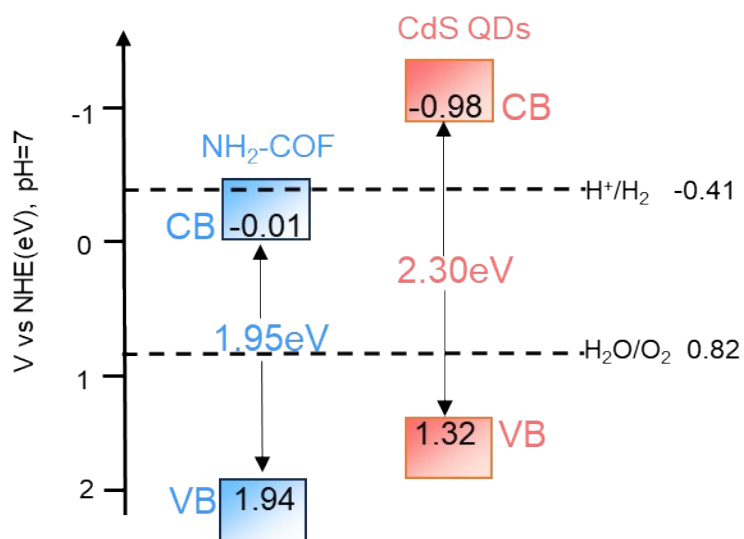

Figure S14. Band structure diagram of NH<sub>2</sub>-COF and CdS QDs.

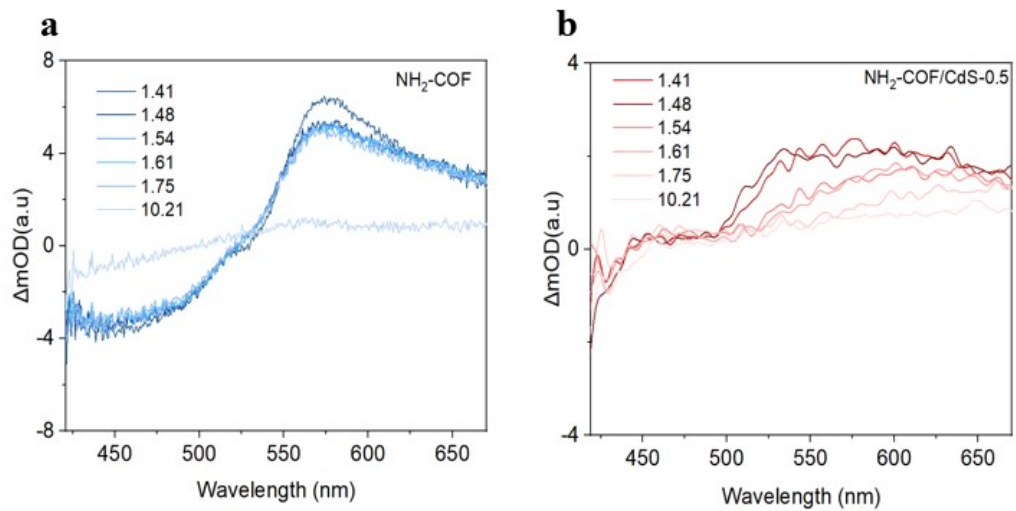

Figure S15. TA plots recorded at the indicated delay time for (a)  $NH_2$ -COF and (b)  $NH_2$ -COF/CdS-0.5.

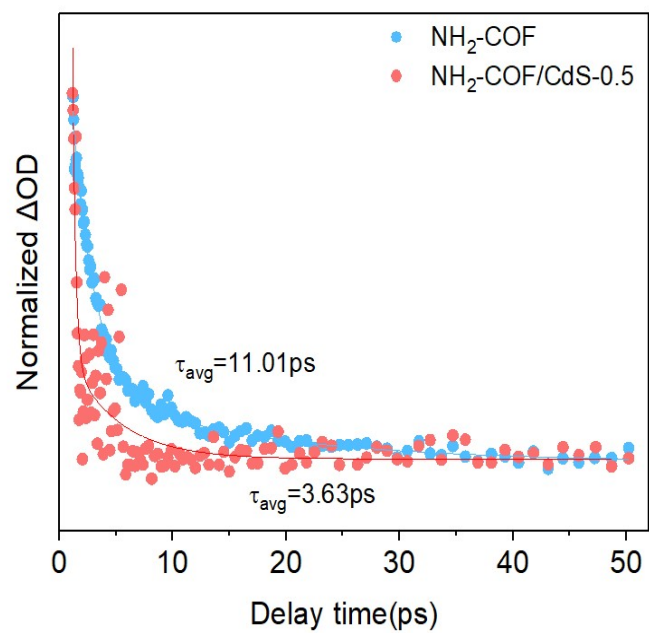

Figure S16. Normalized decay kinetic curves of NH<sub>2</sub>-COF and NH<sub>2</sub>-COF/CdS-0.5 at 574 nm.

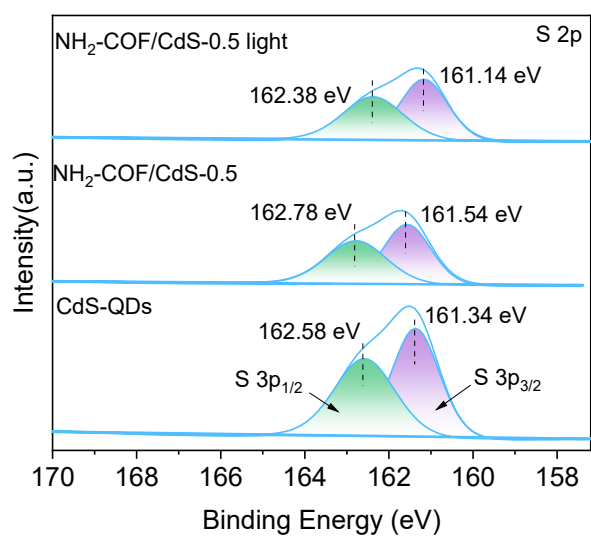

Figure S17. High-resolution XPS spectra of S 2p for NH<sub>2</sub>-COF/CdS-0.5.

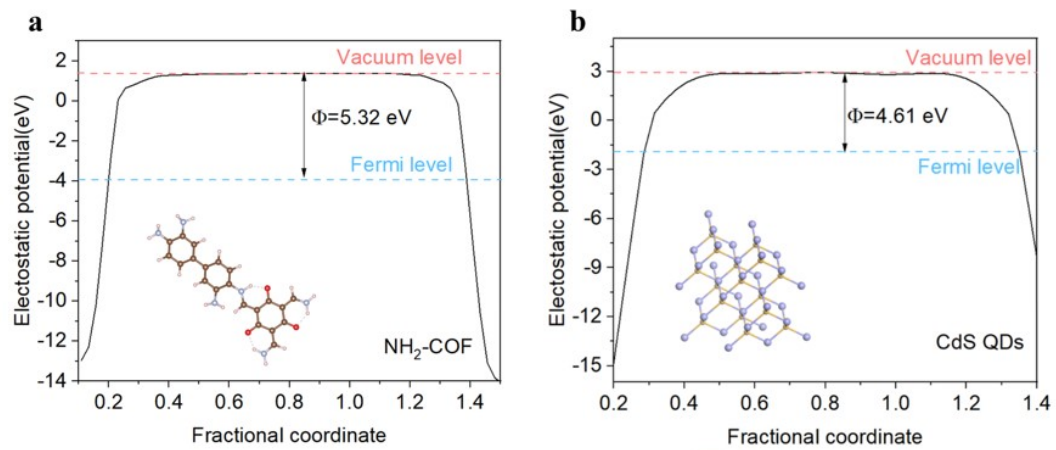

Figure S18. DFT-calculated work functions of (a) NH<sub>2</sub>-COF and (b) CdS QDs.

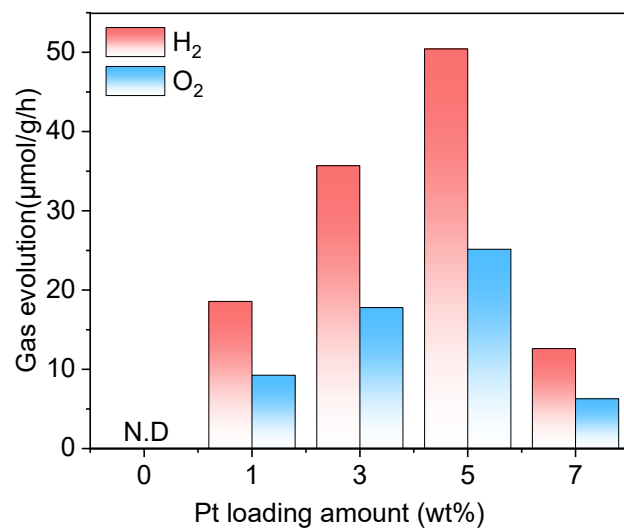

Figure S19. The photocatalytic OWS activities over Pt (X wt%) NH<sub>2</sub>-COF/CdS-1. (X=0, 1, 3, 5, 7 wt%)

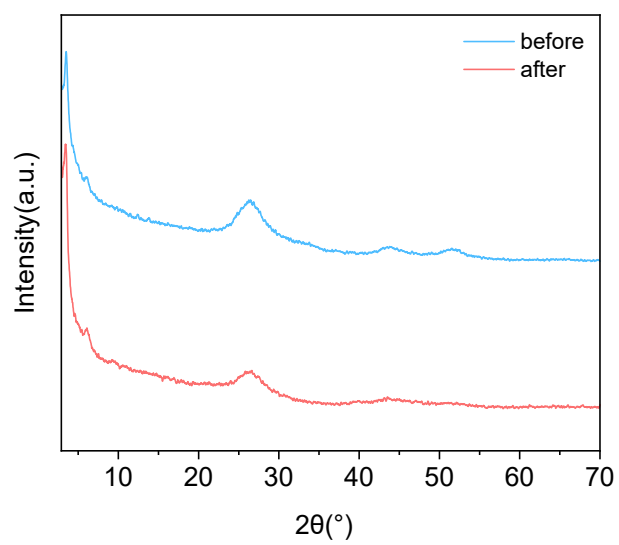

Figure S20. The PXRD patterns of NH<sub>2</sub>-COF/CdS-0.5 composites before and after photocatalysis reaction.

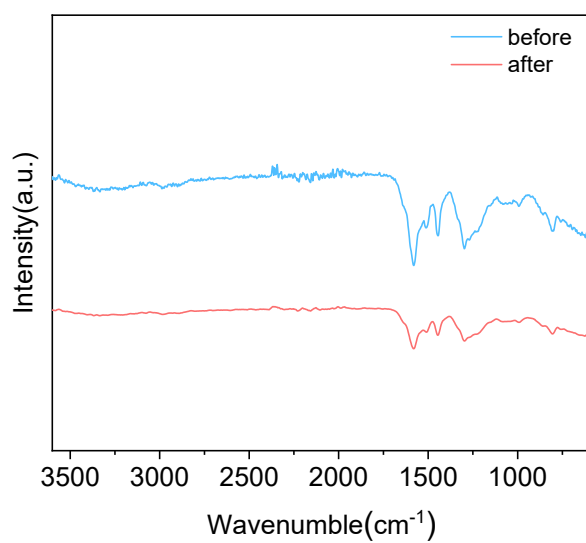

Figure S21. The FT-IR spectra of NH<sub>2</sub>-COF/CdS-0.5 composites before and after photocatalysis reaction.

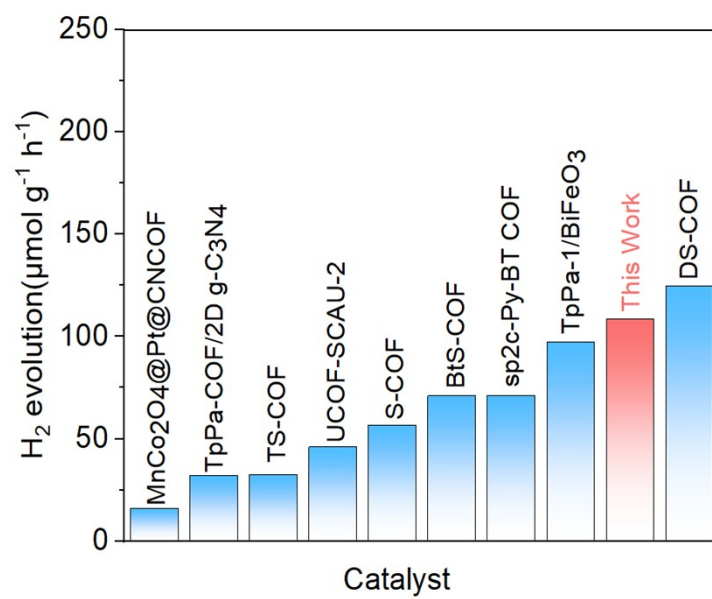

Figure S22. Comparison of catalytic overall water splitting rate of COFs and COF-based photocatalysts.

**Table S1.** CHNS elemental analysis results of COFs and COFs/CdS-0.5.

| COF <sup>a</sup>             | C (wt%) | H (wt%) | N (wt%) | S (wt%) |
|------------------------------|---------|---------|---------|---------|
|                              | Expt.   | Expt.   | Expt.   | Expt.   |
| NO <sub>2</sub> -COF         | 56.41   | 2.85    | 14.39   | 0       |
| NH <sub>2</sub> -COF         | 66.65   | 4.91    | 17.02   | 0       |
| NO <sub>2</sub> -COF/CdS-0.5 | 51.23   | 2.45    | 12.89   | 1.56    |
| NH <sub>2</sub> -COF/CdS-0.5 | 60.15   | 4.04    | 15.72   | 4.32    |

[a] Expt. = experimental value.

**Table S2.** The comparison of the photocatalytic OWS on COF and COF-based photocatalysts.

| Photocatalysts                                              | Cocatalyst                                         | HER<br>( $\mu\text{mol g}^{-1} \text{h}^{-1}$ ) | OER<br>( $\mu\text{mol g}^{-1} \text{h}^{-1}$ ) | Ref.      |
|-------------------------------------------------------------|----------------------------------------------------|-------------------------------------------------|-------------------------------------------------|-----------|
| NH <sub>2</sub> -COF/CdS-0.5                                | Pt                                                 | 108.7                                           | 52.2                                            | This work |
| MnCo <sub>2</sub> O <sub>4</sub> @Pt@CNCOF                  | Ag@Cr <sub>2</sub> O <sub>3</sub>                  | 16.2                                            | 7.8                                             | 6         |
| TpPa-COF/2D g-C <sub>3</sub> N <sub>4</sub>                 | Ag@Cr <sub>2</sub> O <sub>3</sub><br>Pt            | 32                                              | 15.8                                            | 7         |
| TS-COF                                                      | Pt<br>IrO <sub>2</sub>                             | 32.5                                            | 16.3                                            | 8         |
| UCOF-SCAU-2                                                 | Pt                                                 | 46                                              | 21                                              | 9         |
| S-COF                                                       | Pt<br>IrO <sub>2</sub>                             | 56.6                                            | 29.2                                            | 8         |
| BtS-COF                                                     | Pt                                                 | 71                                              | 34                                              | 10        |
| sp <sup>2</sup> c-Py-BT COF                                 | Pt<br>Co(OH) <sub>2</sub>                          | 71.3                                            | 30.8                                            | 11        |
| $\alpha$ -Fe <sub>2</sub> O <sub>3</sub> /TpPa-1-COF/FeP-PC | $\alpha$ -Fe <sub>2</sub> O <sub>3</sub><br>FeP-PC | 97.45                                           | 48.46                                           | 12        |
| DS-COF                                                      | Pt, IrO <sub>2</sub>                               | 124.7                                           | 59.4                                            | 8         |
| 0.5- $\gamma$ -Ga <sub>2</sub> O <sub>3</sub> /CdS          | /                                                  | 131.7                                           | 61.8                                            | 13        |

|                                                                        |   |     |     |    |
|------------------------------------------------------------------------|---|-----|-----|----|
| BiVO <sub>4</sub> /Au/CdS                                              | / | 281 | 138 | 14 |
| 2.0%MoS <sub>2</sub> -0.2CdS/WO <sub>3</sub> -<br>1.0%MnO <sub>2</sub> | / | 633 | 200 | 15 |

**Table S3. Comparison of COF/CdS-based photocatalysts.**

| <b>Synthesis Strategy</b>   | <b>photocatalyst</b> | <b>application</b>                                                                 | <b>performance</b>                                                                                                                      | <b>Ref.</b> |
|-----------------------------|----------------------|------------------------------------------------------------------------------------|-----------------------------------------------------------------------------------------------------------------------------------------|-------------|
| in-situ formation           | CdS/BUCT-COF-20      | photocatalytic hydrogen evolution                                                  | H <sub>2</sub> production rate:<br>1040 $\mu\text{mol}\cdot\text{g}^{-1}\cdot\text{h}^{-1}$                                             | 16          |
|                             | PyTdCdS5             | Coupled photocatalytic hydrogen peroxide generation and selective oxidation of PXG | H <sub>2</sub> O <sub>2</sub> production rate: 7.86 $\text{mmol}\cdot\text{g}^{-1}$<br>PXG conversion rate: 95%                         | 17          |
| electrostatic self-assembly | CdS-1%COF            | photocatalytic hydrogen evolution                                                  | H <sub>2</sub> production rate:<br>15.1 $\text{mmol}\cdot\text{g}^{-1}\cdot\text{h}^{-1}$                                               | 18          |
|                             | TFPD/CdS-2:8         | photocatalytic hydrogen evolution<br>Selective oxidation of HMF into DFF           | H <sub>2</sub> production rate:<br>228.7 $\mu\text{mol}\cdot\text{g}^{-1}\cdot\text{h}^{-1}$<br>HMF conversion and DFF selectivity: 91% | 19          |
| physical mixing             | 1.5wt%COF/CdS        | photocatalytic hydrogen evolution                                                  | H <sub>2</sub> production rate:<br>8670 $\mu\text{mol}\cdot\text{g}^{-1}\cdot\text{h}^{-1}$                                             | 20          |
| ultrasonic-assisted method  | 0.5wt%CdS/COF        | Visible-light photocatalytic degradation of organic pollutants                     | BPA removal rate after 3 h irradiation:<br>85.68%                                                                                       | 21          |

|                         |                              |                                                                  |                                                                                                                                                                   |                  |
|-------------------------|------------------------------|------------------------------------------------------------------|-------------------------------------------------------------------------------------------------------------------------------------------------------------------|------------------|
| interfacial<br>bridging | NH <sub>2</sub> -COF/CdS-0.5 | Sacrificial-agent-free overall<br>photocatalytic water splitting | H <sub>2</sub> production rate:<br>108.7 μmol g <sup>-1</sup> h <sup>-1</sup><br><br>O <sub>2</sub> production rate:<br>52.2 μmol g <sup>-1</sup> h <sup>-1</sup> | This<br><br>Work |
|-------------------------|------------------------------|------------------------------------------------------------------|-------------------------------------------------------------------------------------------------------------------------------------------------------------------|------------------|

## Supplementary References

- 1 X. Zhong, Q. Ling, P. Kuang and B. Hu, *Chemical Engineering Journal*, 2024, **483**, 149339.
- 2 M. S. Lohse, T. Stassin, G. Naudin, S. Wuttke, R. Ameloot, D. De Vos, D. D. Medina and T. Bein, *Chemistry of Materials*, 2016, **28**, 626-631.
- 3 J. Wang, T. Xia, L. Wang, X. Zheng, Z. Qi, C. Gao, J. Zhu, Z. Li, H. Xu and Y. Xiong, *Angewandte Chemie International Edition*, 2018, **57**, 16447-16451.
- 4 G. Kresse and J. Furthmüller, *Physical Review B*, 1996, **54**, 11169-11186.
- 5 J. P. Perdew, K. Burke and M. Ernzerhof, *Physical Review Letters*, 1996, **77**, 3865-3868.
- 6 Y. Yuan, Q. Yang, X. Li, Y. Shama, H. Yan and C. Wang, *Int. J. Hydrogen Energy*, 2024, **61**, 407-414.
- 7 Y. Li, J. Wang, S. Xu, M. Li and F. Chen, *Int. J. Hydrogen Energy*, 2024, **60**, 1433-1441.
- 8 X. Zhang, Z. Xiao, L. Jiao, H. Wu, Y.-X. Tan, J. Lin, D. Yuan and Y. Wang, *Angew. Chem. Int. Ed.*, 2024, **63**, e202408697.
- 9 R. Shen, C. Qin, L. Hao, X. Li, P. Zhang and X. Li, *Adv. Mater.*, 2023, **35**, 2305397.
- 10 Q. Niu, W. Deng, Y. Chen, Q. Lin, L. Li, Z. Liu, J. Bi and Y. Yu, *ACS Energy Lett.*, 2024, **9**, 5830-5835.
- 11 J. Cheng, Y. Wu, W. Zhang, J. Zhang, L. Wang, M. Zhou, F. Fan, X. Wu and H. Xu, *Adv. Mater.*, 2024, **36**, 2305313.
- 12 M.-L. Xu, J.-R. Li, X.-M. Wu, T. Yu, G.-Y. Qin, F.-J. Wang, L.-N. Zhang, K. Li and X. Cheng, *Appl. Surf. Sci.*, 2022, **602**, 154371.
- 13 X. Pan, X. Wang, Z. Zhang, C. Ma, J. Chen, Y. Yuan, H. Li, *J. Alloy. Compd.*, 2025, **1013**, 178595.
- 14 X. Xu, Z. Wang, W. Qiao, F. Luo, J. Hu, D. Wang, Y. Zhou, *Int. J. Hydrogen Energy.*, 2021, **46**, 8531.
- 15 D. Wei, Y. Ding, Z. Li, *Int. J. Hydrogen Energy.*, 2020, **45**, 17320. T. Wang, B. Yang, Z. Zhou, Y. Wu, Z. Jin, *Small*, 2025, **21**, 2501128.
- 16 T. Wang, B. Yang, Z. Zhou, Y. Wu, Z. Jin, *Small*, 2025, **21**, 2501128.
- 17 G. Tang, J. Zhang, C. Bie, X. Zheng, C. Jiang, J. Yu, *Adv. Mater.*, 2025, **37**, e14576.
- 18 G. Sun, J. Zhang, B. Cheng, H. Yu, J. Yu, J. Xu, *Chem. Eng. J.*, 2023, **476**, 146818.
- 19 B. Qi, R. Shen, Z. Ren, Y. Teng, H. Ding, X. Zhang, Y. Zhang, L. Hao, X. Li, *J. Mater. Sci. Technol.*, 2025, **232**, 65.
- 20 L. Sun, L. Li, J. Yang, J. Fan, Q. Xu, *Chin. J. Catal.*, 2022, **43**, 350.
- 21 C. Sun, L. Karuppasamy, L. Gurusamy, H.-J. Yang, C.-H. Liu, J. Dong, J. J. Wu, *Sep. Purif. Technol.*, 2021, **271**, 118873.
